# Supplementary material for: Highly permeable and antifouling reverse osmosis membranes with acidified graphitic carbon nitride nanosheets as nanofillers
Source: Royal Society of Chemistry journal article supplement (doi:10.1039/c7ta06348b), 2017-01-01
Supplement: c7ta06348b1.pdf [file c7ta06348b1.pdf]

## Electronic Supplementary Information

### Highly permeable and antifouling reverse osmosis membrane with acidified graphitic carbon nitride nanosheets as nanofiller

Xiang Gao,<sup>a, b</sup> Yiming Li,<sup>a, \*</sup> Xiaolong Yang,<sup>a</sup> Yong Wang,<sup>c</sup> Baoyu Gao,<sup>b</sup> and  
Zhining Wang<sup>b, \*</sup>

<sup>a</sup> Key Laboratory of Marine Chemistry Theory and Technology, Ministry of Education, Ocean University of China, Qingdao 266100, PR China.

<sup>b</sup> Shandong Key Laboratory of Water Pollution Control and Resource Reuse, School of Environmental Science and Engineering, Shandong University, Jinan 250100, PR China.

<sup>c</sup> State Key Laboratory of Materials-Oriented Chemical Engineering, College of Chemistry and Chemical Engineering, Nanjing University of Technology, Nanjing 210009, PR China.

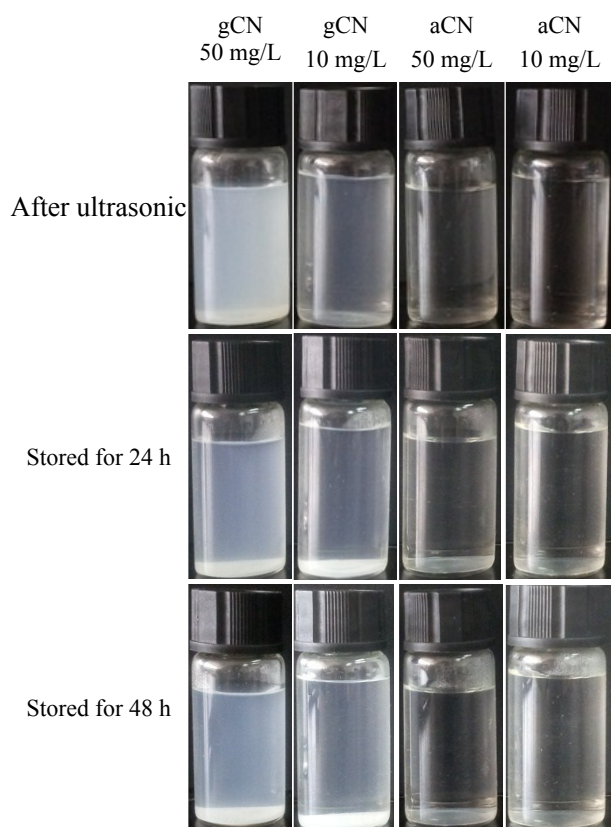

**Fig. S1** Photographs of the gCN and aCN aqueous dispersions with different carbon nitride concentration and storage time

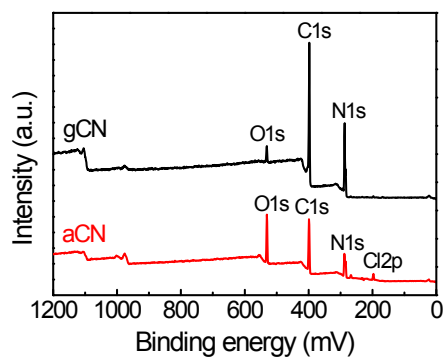

**Fig. S2** XPS spectra of gCN and aCN.

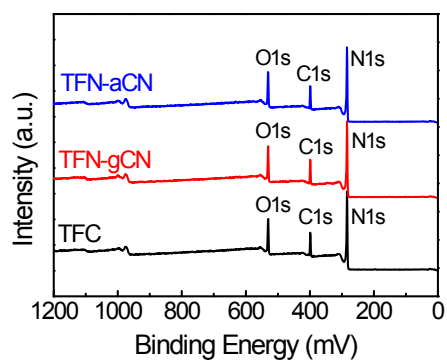

**Fig. S3** XPS spectra of the prepared membranes.

**Table S1.** XPS results for gCN, aCN, TFC and TFN membranes.

| Atomic % | gCN    | aCN    | TFC    | TFN-aCN | TFN-gCN |
|----------|--------|--------|--------|---------|---------|
| Cl 2p    | 0.371  | 2.314  | 0      | 0       | 0       |
| C 1s     | 46.568 | 38.467 | 72.935 | 72.569  | 72.433  |
| N 1s     | 48.821 | 39.284 | 12.760 | 13.157  | 13.748  |
| O 1s     | 4.239  | 19.935 | 14.305 | 14.274  | 13.819  |

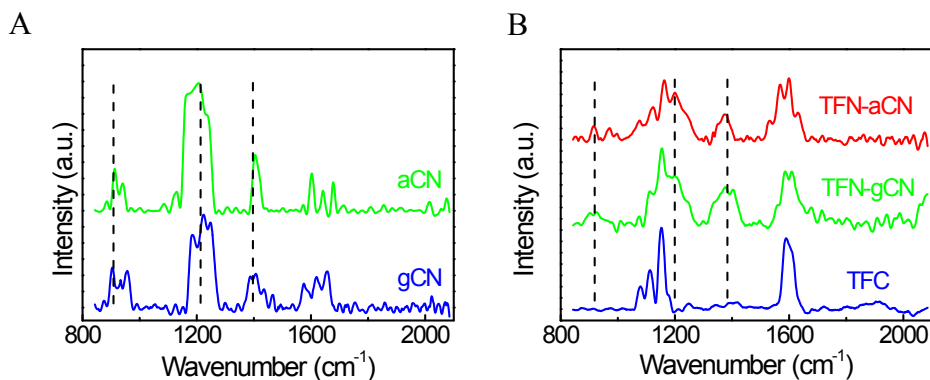

**Fig. S4** Raman spectra of (A) gCN and aCN, and (B) PA layers of TFC, TFN-gCN and TFN-aCN membranes.

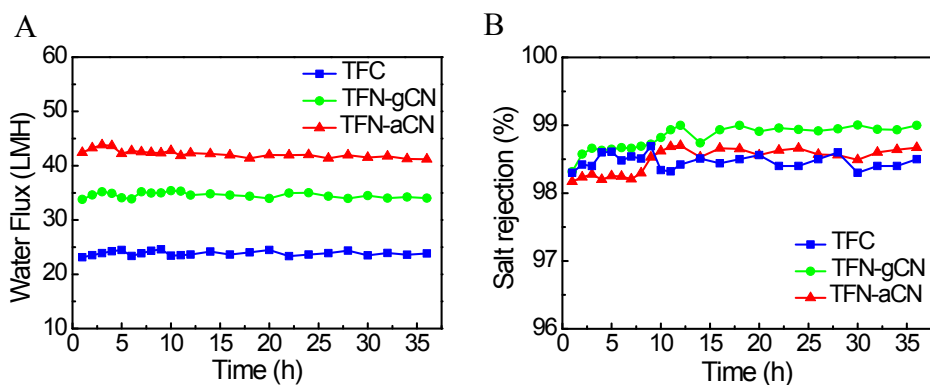

**Fig. S5** Long-term separation performance of (A) water flux and (B) salt rejection of the TFC and TFN membranes as a function of time by using 2 g/l NaCl solution at 16 bar and 25 °C.

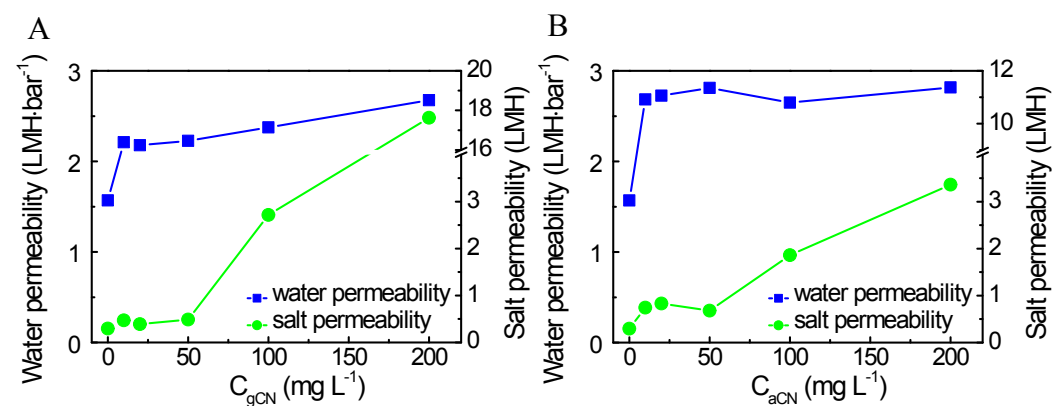

**Fig. S6** Water permeability (A) and solute permeability (B) of the (A) TFN-gCN and (B) TFN-aCN membranes
